# Supplementary material for: Novel highly conductive ferroferric oxide/porous carbon nanofiber composites prepared by electrospinning as anode materials for high performance Li-ion batteries
Source: Royal Society of Chemistry journal article supplement (doi:10.1039/c6ra04090j), 2016-01-01
Supplement: c6ra04090j1.pdf [file c6ra04090j1.pdf]

Supporting Information for

**A Novel High Conductive Ferroferric Oxide/Porous Carbon Nanofibers  
Composites Prepared by Electrospinning as Anode Materials for High  
Performance Li-ion Batteries**

Shoupu Zhu, Ming Chen\*, Jing Sun, Jingwen Liu, Tian Wu, Haiming Su, Shanshan Qu,  
Yongjuan Xie, Shishuang Wang, Xun Su and Guowang Diao\*

College of Chemistry and Chemical Engineering, Yangzhou University, Yangzhou  
225002, P. R. China

Key Laboratory of Environmental Materials & Environmental Engineering of Jiangsu  
Province, Yangzhou 225002, Jiangsu, P. R.China

\* Corresponding author. Tel.: +86 514 87975436; fax: +86 514 87975244.

E-mail address: gwdiao@yzu.edu.cn (G. Diao), chenming@yzu.edu.cn (M. Chen).

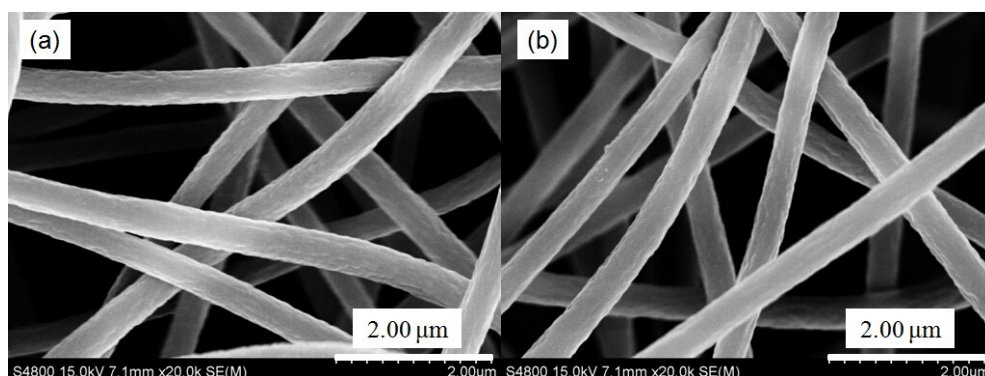

**Fig. S1** SEM images of PAN0 (a) and PAN3 (b).

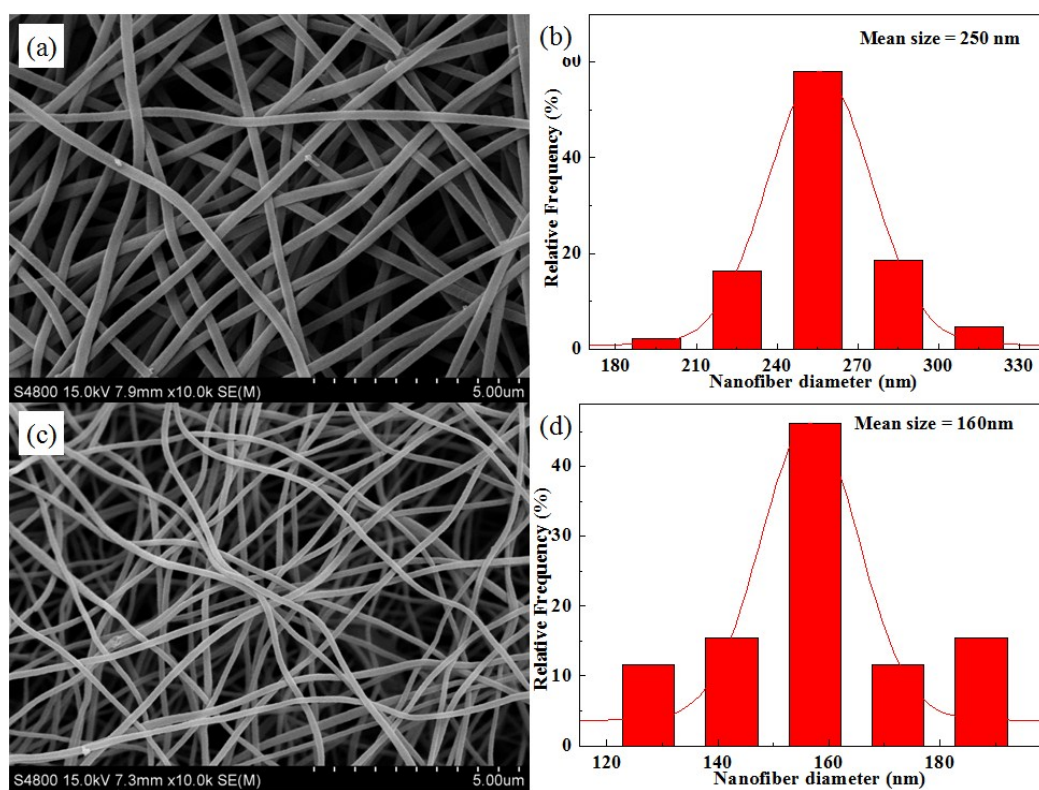

**Fig. S2** SEM images of PAN3-400 (a), PAN3-500 (c) and relevant diameter distributions of PAN3-400 (b), PAN3-500 (d).

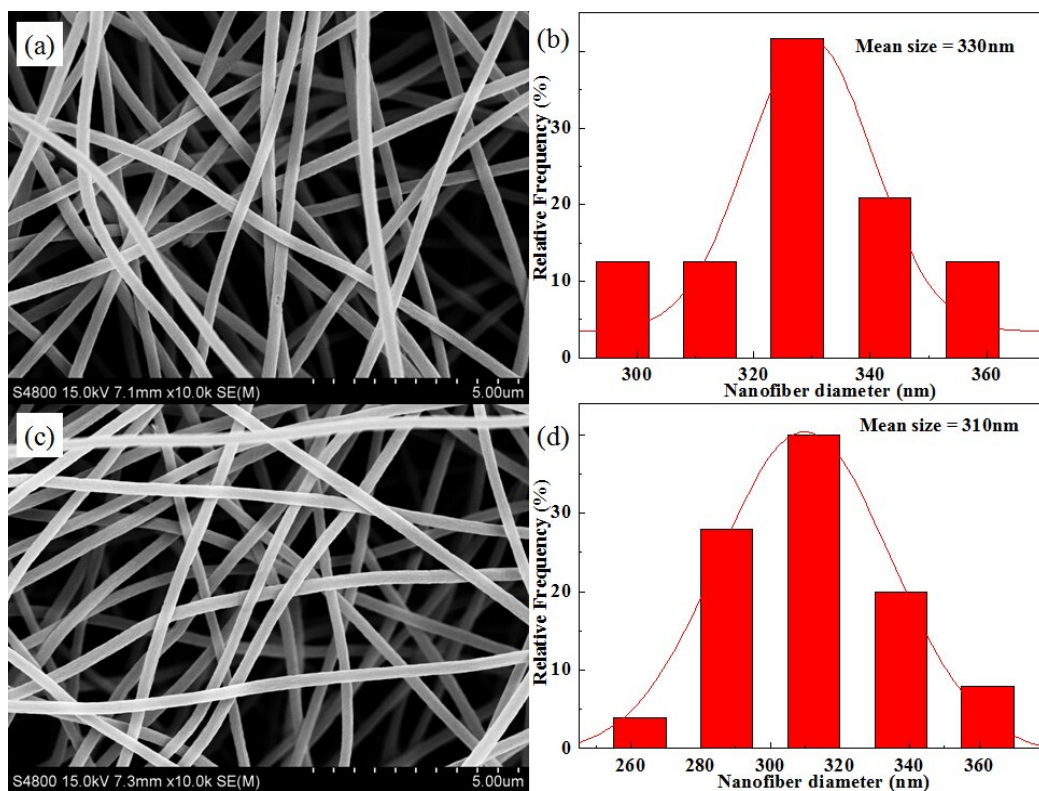

**Fig. S3** SEM images of PAN0-400 (a), PAN0-500 (c) and relevant diameter distributions of PAN0-400 (b), PAN0-500 (d).

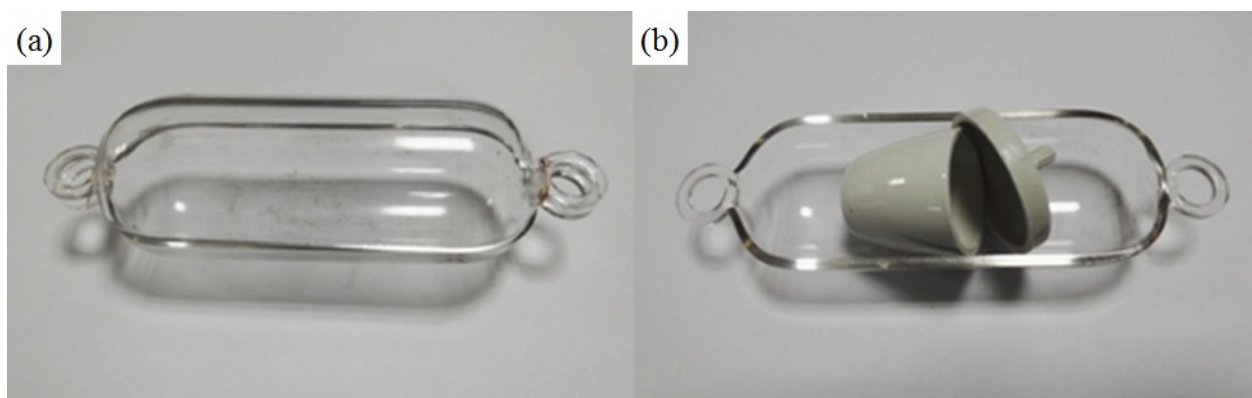

**Fig. S4** Two different equipments in the third calcination process.

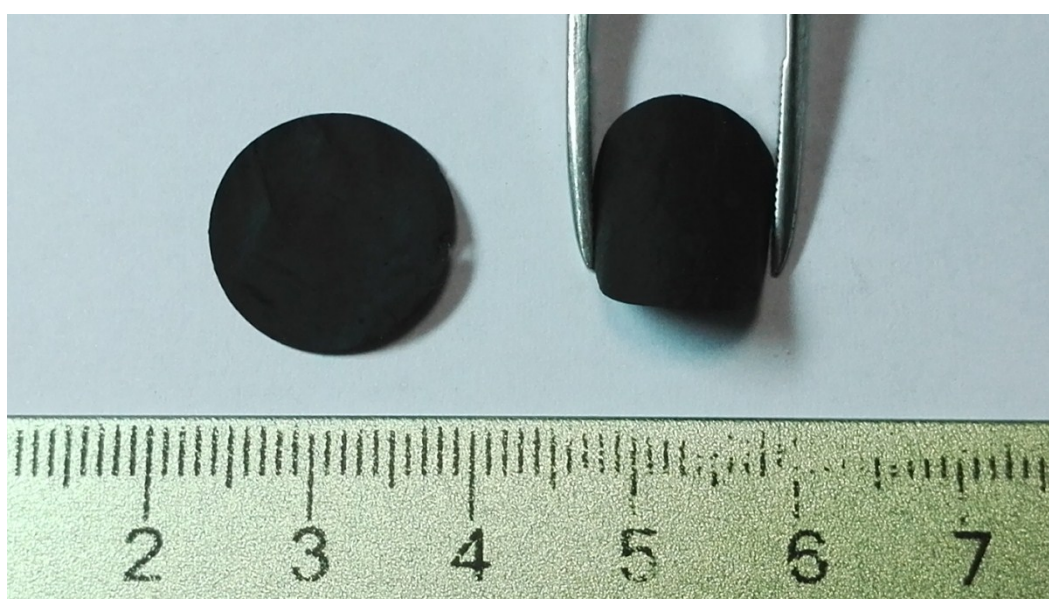

**Fig. S5** Picture of flexible PAN3-500.

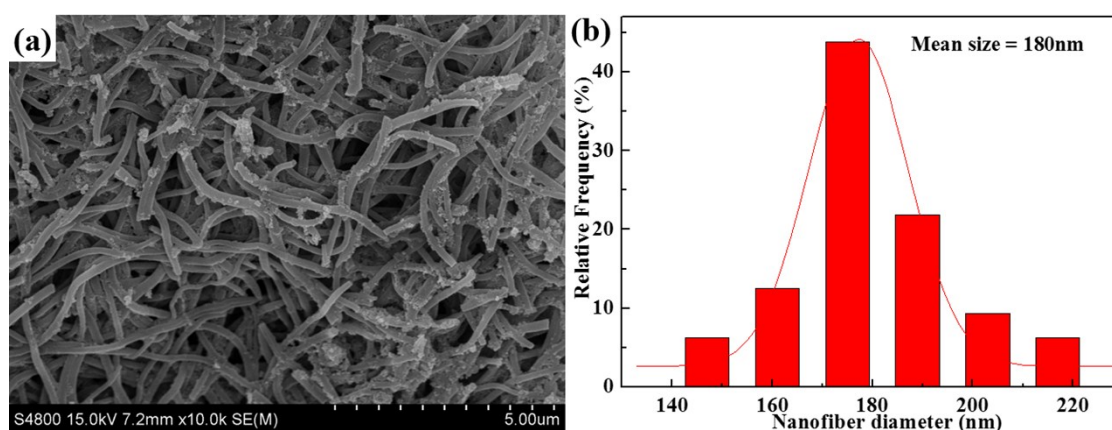

**Fig. S6** SEM image of PAN3-500 after 100 charge-discharge cycles and one discharge cycle

(a) and relevant diameter distribution (b).
